# Supplementary material
Source: PubMed Central journal article supplement (PMC4538465)
Supplement: AAC.00662-15_zac009154303so1.pdf [file AAC.00662-15_zac009154303so1.pdf]

Supplementary Table 1. OFX, LVX, MXF cross resistance

| Isolate # | GyrA Allele                  | GyrB Allele* | OFX Susceptibility (2 µg/mL) | MXF Susceptibility (0.5 µg/mL) | MXF Susceptibility (2 µg/mL) | LVX Susceptibility (1 µg/mL) |
|-----------|------------------------------|--------------|------------------------------|--------------------------------|------------------------------|------------------------------|
| 20        | Ala90Val                     |              | R                            | R                              | S                            | R                            |
| 35        | Ala90Val                     |              | R                            | R                              | S                            | R                            |
| 36        | Ala90Val                     |              | R                            | R                              | S                            | R                            |
| 37        | Ala90Val                     |              | R                            | R                              | S                            | R                            |
| 39        | Ala90Val                     |              | R                            | R                              | S                            | R                            |
| 49        | Ala90Val                     |              | R                            | R                              | S                            | R                            |
| 76        | Ala90Val                     |              | R                            | R                              | S                            | R                            |
| 81        | Ala90Val                     |              | R                            | R                              | S                            | R                            |
| 89        | Ala90Val                     |              | R                            | R                              | S                            | R                            |
| 90        | Ala90Val                     |              | R                            | R                              | S                            | R                            |
| 107       | Ala90Val                     |              | R                            | R                              | R                            | R                            |
| 138       | Ala90Val                     |              | R                            | R                              | S                            | R                            |
| 139       | Ala90Val                     |              | R                            | R                              | S                            | R                            |
| 145       | Ala90Val                     |              | R                            | R                              | S                            | R                            |
| 152       | Ala90Val                     |              | R                            | R                              | S                            | R                            |
| 155       | Ala90Val                     |              | R                            | R                              | S                            | R                            |
| 156       | Ala90Val                     |              | R                            | R                              | S                            | R                            |
| 163       | Ala90Val                     |              | R                            | R                              | S                            | R                            |
| 172       | Ala90Val                     |              | R                            | R                              | S                            | R                            |
| 173       | Ala90Val                     |              | R                            | R                              | S                            | R                            |
| 180       | Ala90Val                     |              | R                            | R                              | S                            | R                            |
| 192       | Ala90Val                     |              | R                            | R                              | S                            | R                            |
| 193       | Ala90Val                     |              | R                            | R                              | S                            | R                            |
| 272       | Ala90Val                     |              | R                            | R                              | S                            | R                            |
| 88        | Ala90Val, Asp94Gly           |              | R                            | R                              | R                            | R                            |
| 187       | Ala90Val, Gly88Cys, Asp94Gly |              | R                            | R                              | R                            | R                            |
| 141       | Ala90Val, Ser91Pro           |              | R                            | R                              | S                            | R                            |
| 153       | Asp89Asn                     |              | R                            | R                              | R                            | R                            |
| 38        | Asp89Gly                     |              | S                            | R                              | S                            | S                            |
| 42        | Asp94Ala                     |              | R                            | R                              | R                            | R                            |
| 43        | Asp94Ala                     |              | R                            | R                              | R                            | R                            |
| 45        | Asp94Ala                     |              | R                            | R                              | S                            | R                            |
| 46        | Asp94Ala                     |              | R                            | R                              | S                            | R                            |
| 55        | Asp94Ala                     |              | S                            | R                              | S                            | R                            |
| 57        | Asp94Ala                     |              | R                            | R                              | S                            | R                            |
| 71        | Asp94Ala                     |              | R                            | R                              | S                            | R                            |
| 144       | Asp94Ala                     |              | R                            | R                              | R                            | R                            |
| 171       | Asp94Ala                     |              | R                            | R                              | S                            | R                            |
| 195       | Asp94Ala                     |              | R                            | R                              | S                            | R                            |
| 198       | Asp94Ala                     |              | R                            | S                              | S                            | R                            |
| 273       | Asp94Ala                     |              | R                            | R                              | S                            | R                            |

|     |                    |           |   |   |   |   |
|-----|--------------------|-----------|---|---|---|---|
| 4   | Asp94Asn           |           | R | R | R | R |
| 34  | Asp94Asn           |           | R | R | R | R |
| 86  | Asp94Asn           |           | R | R | R | R |
| 146 | Asp94Asn           |           | R | R | R | R |
| 149 | Asp94Asn           |           | R | R | R | R |
| 183 | Asp94Asn           |           | R | R | R | R |
| 184 | Asp94Asn           |           | R | R | R | R |
| 188 | Asp94Asn           |           | R | R | R | R |
| 270 | Asp94Asn           |           | R | R | R | R |
| 274 | Asp94Asn           |           | R | R | R | R |
| 275 | Asp94Asn           |           | R | R | R | R |
| 44  | Asp94Gly           |           | R | R | R | R |
| 56  | Asp94Gly           |           | R | R | R | R |
| 85  | Asp94Gly           |           | R | R | R | R |
| 87  | Asp94Gly           |           | R | R | R | R |
| 95  | Asp94Gly           |           | R | R | R | R |
| 96  | Asp94Gly           |           | R | R | R | R |
| 103 | Asp94Gly           |           | R | R | R | R |
| 104 | Asp94Gly           |           | R | R | R | R |
| 140 | Asp94Gly           |           | R | R | R | R |
| 142 | Asp94Gly           |           | R | R | R | R |
| 143 | Asp94Gly           |           | R | R | R | R |
| 147 | Asp94Gly           |           | R | R | R | R |
| 148 | Asp94Gly           |           | R | R | R | R |
| 150 | Asp94Gly           |           | R | R | R | R |
| 151 | Asp94Gly           |           | R | S | S | R |
| 166 | Asp94Gly           |           | R | R | S | R |
| 167 | Asp94Gly           |           | R | R | R | R |
| 168 | Asp94Gly           |           | R | R | R | R |
| 176 | Asp94Gly           |           | R | R | R | R |
| 181 | Asp94Gly           |           | R | R | S | R |
| 182 | Asp94Gly           |           | R | R | R | R |
| 185 | Asp94Gly           |           | R | R | R | R |
| 186 | Asp94Gly           |           | R | R | R | R |
| 266 | Asp94Gly           |           | R | R | R | R |
| 267 | Asp94Gly           |           | R | R | R | R |
| 33  | Asp94Tyr           |           | R | R | S | R |
| 178 | Asp94Tyr           |           | R | R | S | R |
| 82  | Gly88Cys           |           | R | R | R | R |
| 174 | Ser91Pro           |           | R | R | S | R |
| 177 | Ser91Pro, Asp94Gly |           | R | R | R | R |
| 269 | WT                 | Asn538Asp | R | R | S | R |
| 99  | WT                 | Asn538Lys | R | R | R | R |
| 105 | WT                 | Asp500Asn | R | S | S | R |
| 200 | WT                 | Asp500Asn | R | S | S | R |

|     |    |           |   |   |   |   |
|-----|----|-----------|---|---|---|---|
| 159 | WT | Asp500His | R | R | S | R |
| 2   | WT |           | S | S | S | S |
| 5   | WT |           | S | S | S | S |
| 11  | WT |           | S | S | S | S |
| 15  | WT |           | S | S | S | S |
| 22  | WT |           | S | S | S | S |
| 27  | WT |           | S | S | S | S |
| 51  | WT |           | S | S | S | S |
| 58  | WT |           | S | S | S | S |
| 63  | WT |           | S | S | S | S |
| 77  | WT |           | S | S | S | S |
| 79  | WT |           | S | S | S | S |
| 83  | WT |           | S | S | S | S |
| 100 | WT |           | S | S | S | S |
| 108 | WT |           | S | S | S | S |
| 109 | WT |           | S | S | S | S |
| 111 | WT |           | S | S | S | S |
| 115 | WT |           | S | S | S | S |
| 119 | WT |           | S | S | S | S |
| 123 | WT |           | S | S | S | S |
| 127 | WT |           | S | S | S | S |
| 135 | WT |           | S | S | S | S |
| 175 | WT |           | S | S | S | S |
| 233 | WT |           | S | S | S | S |
| 234 | WT |           | S | S | S | S |
| 235 | WT |           | S | S | S | S |
| 236 | WT |           | S | S | S | S |
| 237 | WT |           | S | S | S | S |
| 238 | WT |           | S | S | S | S |
| 239 | WT |           | S | S | S | S |
| 240 | WT |           | S | S | S | S |
| 241 | WT |           | S | S | S | S |
| 242 | WT |           | S | S | S | S |
| 243 | WT |           | S | S | S | S |
| 244 | WT |           | S | S | S | S |
| 245 | WT |           | S | S | S | S |
| 247 | WT |           | S | S | S | S |
| 248 | WT |           | S | S | S | S |
| 249 | WT |           | S | S | S | S |
| 250 | WT |           | S | S | S | S |
| 251 | WT |           | S | S | S | S |
| 252 | WT |           | S | S | S | S |
| 253 | WT |           | S | S | S | S |
| 255 | WT |           | S | S | S | S |
| 256 | WT |           | S | S | S | S |

|     |    |   |   |   |   |
|-----|----|---|---|---|---|
| 257 | WT | S | S | S | S |
| 268 | WT | S | R | S | S |

---

\*Data present only for isolates for which *gyrB*QRDR mutations were identified.

R=resistant, S=susceptible
